# Supplementary material for: CRISPR-Mediated Endogenous Activation of Fibroin Heavy Chain Gene Triggers Cellular Stress Responses in Bombyx mori Embryonic Cells
Source: MDPI journal article supplement (doi:10.3390/insects12060552), 2021-06-13
Supplement: s1 [file s1]

## Supplementary data

### CRISPR-mediated endogenous activation of fibroin heavy chain gene triggers cellular stress responses in *Bombyx mori* embryonic cells

Wenbo Hu <sup>1,2</sup>, Xiaogang Wang <sup>1</sup>, Sanyuan Ma <sup>1,2</sup>, Zhangchuan Peng <sup>1,2</sup>, Yang Cao <sup>1,2</sup> and Qingyou Xia <sup>1,2,\*</sup>

<sup>1</sup> State Key Laboratory of Silkworm Genome Biology, Biological Science Research Center, Southwest University, Chongqing 400715, China.

<sup>2</sup> Chongqing Key Laboratory of Sericulture Science, Chongqing Engineering and Technology Research Center for Novel Silk Materials, Beibei, Chongqing, China.

\* Correspondence: xiaqy@swu.edu.cn;

#### Table of Contents:

Table S1. Single guide RNA (sgRNA) sequences.

Table S2. Primer sets for qRT-PCR.

Figure S1. Transcriptional activation of *P25* gene in BmE cells

**Table S1. Single guide RNA (sgRNA) sequences.**

| Name          | sgRNA sequence (5' - 3')       | Position in promoter | Strand |
|---------------|--------------------------------|----------------------|--------|
| <i>FibHT1</i> | GCATTCTCCAGGATGGTTG <u>TGG</u> | -392~-371            | Sense  |
| <i>FibHT2</i> | GAAAATTTTCAGTATAAAA <u>AGG</u> | -42~-21              | Sense  |
| <i>FibHT3</i> | TTTCAAATCAGCATCAGTT <u>CGG</u> | -12~+10              | Sense  |
| <i>P25</i>    | AAATAAAATGGCGTCGCCG <u>CGG</u> | -125~-143            | Sense  |
| <i>EGFP</i>   | AGTTCAGCGTGTCCGGCGA <u>GGG</u> | \                    | \      |

The underlined bases represent the protospacer adjacent motif (PAM).

**Table S2. Primer sets for qRT-PCR.**

| Name             | Forward (5' - 3')       | Reverse (5' - 3')        |
|------------------|-------------------------|--------------------------|
| <i>FibH</i>      | TCTGTGTCATCTGCTTCATCTCG | TATCCAGGACGAAGTAAGAAACAA |
| <i>P25</i>       | AGCCGCTGTGGCAGTTTTG     | TAGGTGGCGTTGAAGTATGG     |
| <i>Atg8</i>      | GAGAAAGGCTGAGGGCGA      | TCGTCGGAAAAATGCTATGTAT   |
| <i>E2</i>        | ATGGAAACTGAACATTTAGCG   | TCAGCAGGAGGAGGTCGT       |
| <i>E3</i>        | GCAAACATAACTGAAACATACC  | TCCGTGGCTTGGAGACT        |
| <i>Hsp19.9</i>   | GGCAAACACGAGGAGAA       | TGGGTGCGATTACAGACA       |
| <i>Hsp70</i>     | GGGTGGTGGAAACCTTTG      | GGCACGGTTGTCTTTTCT       |
| <i>Caspase-1</i> | CTTCACTGCTGATAAATGTCC   | TTTCTCCAAGAGTAATAACCTG   |
| <i>Caspase-4</i> | GAAATACGCTACGACATACG    | ACGACTTCAAAGCCAAACT      |
| <i>Dredd</i>     | AGCCGTATGACATGGTATCT    | TGTTTCCAAGTGGGTTTC       |
| <i>Dronc</i>     | GAGATGGGACACTGGGATTT    | GTGGAAGCACGGGATGG        |
| <i>ICE</i>       | TATTCGCTGCCGACCAA       | CGTAAGACGCCCTGCT         |
| <i>Rpl3</i>      | CGGTGTTGTTGGATACATTGAG  | GCTCATCCTGCCATTCTTACT    |

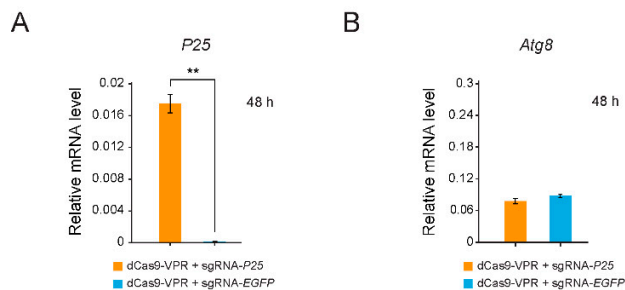

**Figure S1.** Transcriptional activation of *P25* gene in BmE cells. (**A,B**) Relative mRNA levels of *P25* (**A**) and *Atg8* (**B**) at the 48 h after transient transfection of the combination of dCas9-VPR with sgRNA-P25. Expression of the silkworm housekeeping gene *ribosomal protein L3* (*Rpl3*)

was used as a control. Values are means  $\pm$  SD ( $n = 3$ ). Asterisks represent significant differences determined by a Student's  $t$ -test at  $P$  value  $< 0.01$  (\*\*).
